# Supplementary material for: Stabilization Effect of Intrinsically Disordered Regions on Multidomain Proteins: The Case of the Methyl-CpG Protein 2, MeCP2
Source: MDPI journal article supplement (doi:10.3390/biom11081216), 2021-08-16
Supplement: s1 [file s1]

## Article

# Stabilization effect of intrinsically disordered regions on multidomain proteins: The case of the methyl-CpG protein 2, MeCP2

David Ortega-Alarcon <sup>1</sup>, Rafael Claveria-Gimeno <sup>1,2,3</sup>, Sonia Vega <sup>1</sup>, Olga C. Jorge-Torres <sup>4</sup>, Manel Esteller <sup>4,5,6,7</sup>, Olga Abian <sup>1,2,3,8,9\*</sup> and Adrian Velazquez-Campoy <sup>1,3,8,9,10\*</sup>

<sup>1</sup> Institute of Biocomputation and Physics of Complex Systems (BIFI), Joint Units IQFR-CSIC-BIFI, and GBsC-CSIC-BIFI, Universidad de Zaragoza, Zaragoza, 50018, Spain; dortega@bifi.es (D.O.-A.); svega@bifi.es (S.V.); rafacg@certest.es

<sup>2</sup> Instituto Aragonés de Ciencias de la Salud (IACS), 50009, Zaragoza, Spain

<sup>3</sup> Instituto de Investigación Sanitaria de Aragón (IIS Aragón), 50009, Zaragoza, Spain

<sup>4</sup> Josep Carreras Leukaemia Research Institute (IJC), 08916, Badalona, Spain; ojorge@carrerasresearch.org (O.C.J.-T.); mesteller@carrerasresearch.org (M.E.)

<sup>5</sup> Centro de Investigación Biomédica en Red Cáncer (CIBERONC), 28029, Madrid, Spain

<sup>6</sup> Institutio Catalana de Recerca i Estudis Avançats (ICREA), 08010, Barcelona, Spain

<sup>7</sup> Physiological Sciences Department, School of Medicine and Health Sciences, University of Barcelona (UB), l'Hospitalet de Llobregat, 08907, Barcelona, Spain

<sup>8</sup> Centro de Investigación Biomédica en Red en el Área Temática de Enfermedades Hepáticas y Digestivas (CIBERehd), 28029, Madrid, Spain

<sup>9</sup> Departamento de Bioquímica y Biología Molecular y Celular, Universidad de Zaragoza, 50009, Zaragoza, Spain

<sup>10</sup> Fundación ARAID, Gobierno de Aragón, 50009, Zaragoza, Spain

\* Correspondence: oabifra@unizar.es (O.A.); adrianvc@unizar.es (A.V.-C.); Tel.: +34-876-555417 (O.A.); +34-976-762996 (A.V.-C.)

† Current address: Certest Biotec S.L., 50840, Zaragoza, Spain

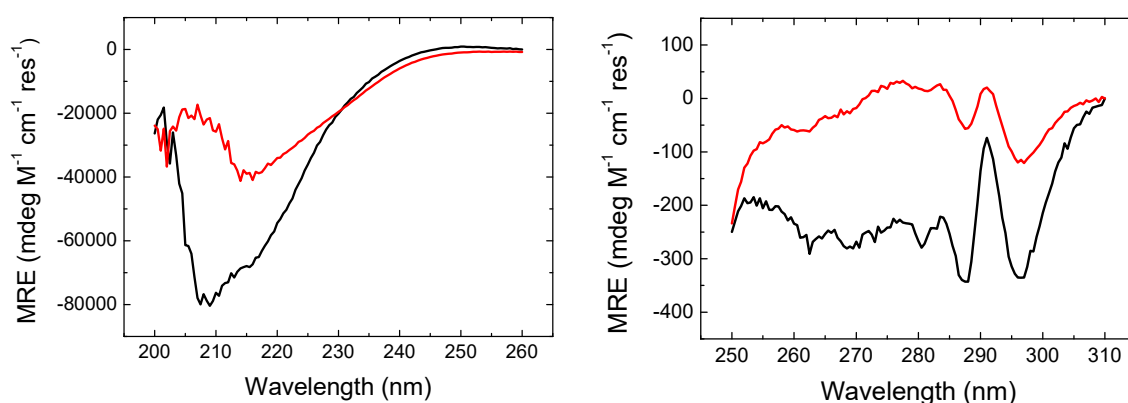

**Figure S1. Circular dichroism.** Far-UV (left) and near-UV (right) circular dichroism spectra of MBD (black) and NTD-MBD-ID (red).

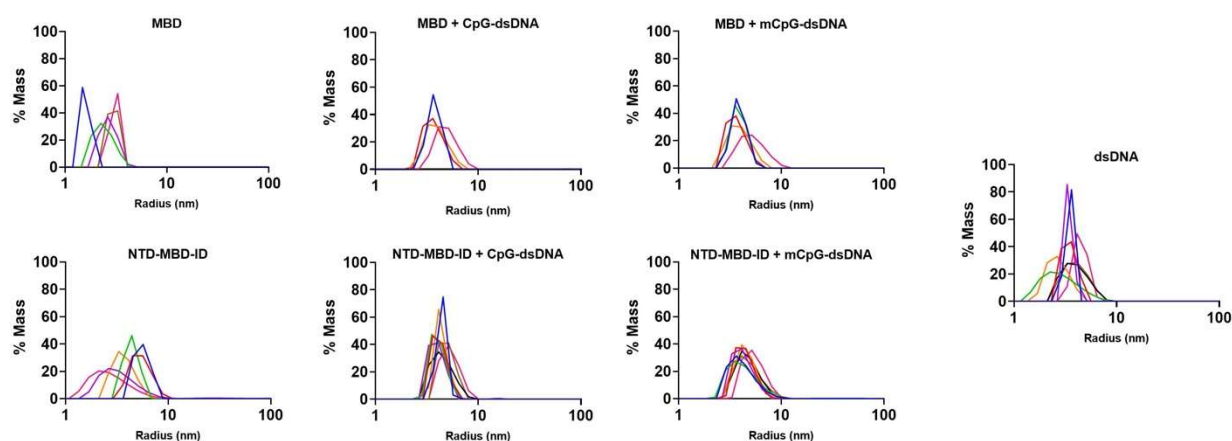

**Figure S2. DLS size histograms.** Size distribution histograms for MBD and NTD-MBD-ID in the absence of dsDNA and the presence of unmethylated and methylated dsDNA, at different urea concentrations: 0 M (blue), 1 M (red), 2 M (green), 3 M (violet), 4 M (orange), 5 M (black), 6 M (brown), and 7 M (pink).
